# Supplementary material
Source: PubMed Central journal article supplement (PMC3258615)
Supplement: 1115585109_pnas.201115585SI.pdf [file 1115585109_pnas.201115585SI.pdf]

# Supporting Information

Kempes et al. 10.1073/pnas.1115585109

## Other Supporting Information Files

[SI Appendix \(PDF\)](#)

[Dataset S1 \(PDF\)](#)

[Dataset S2 \(CSV\)](#)

1  
2  
3  
4  
5  
6  
7  
8  
9  
10  
11  
12  
13  
14  
15  
16  
17  
18  
19  
20  
21  
22  
23  
24  
25  
26  
27  
28  
29  
30  
31  
32  
33  
34  
35  
36  
37  
38  
39  
40  
41  
42  
43  
44  
45  
46  
47  
48  
49  
50  
51  
52  
53  
54  
55  
56  
57  
58  
59  
60  
61  
62

63  
64  
65  
66  
67  
68  
69  
70  
71  
72  
73  
74  
75  
76  
77  
78  
79  
80  
81  
82  
83  
84  
85  
86  
87  
88  
89  
90  
91  
92  
93  
94  
95  
96  
97  
98  
99  
100  
101  
102  
103  
104  
105  
106  
107  
108  
109  
110  
111  
112  
113  
114  
115  
116  
117  
118  
119  
120  
121  
122  
123  
124
