# Supplementary material
Source: PubMed Central journal article supplement (PMC3258615)
Supplement: 1115585109_sd01.pdf [file 1115585109_sd01.pdf]

**Compiled estimates of  $b$  and  $\gamma$**  This document provides our compilation for cell mass,  $b$ , and  $\gamma$ . The  $\gamma$  values are calculated from  $b$  and  $\mu_{max}$ . Temperature normalizations have been carried out for  $b$  and  $\mu_{max}$ . A digital spreadsheet (Dataset S2 in .csv format) of this table is included as part of the supplementary material and it should be noted that this copy includes additional information such as the calculated  $Y$  and  $P$  values, culture conditions, the temperature of each reference, and notes on several of the calculations.

| Species Name                      | Mass (g)              | $b$ ( $s^{-1}$ )      | $\mu_{max}$ ( $s^{-1}$ )                       | $\bar{\gamma}$                                   | ref. for mass | ref. for $b$ | ref. for $\mu_{max}$ |
|-----------------------------------|-----------------------|-----------------------|------------------------------------------------|--------------------------------------------------|---------------|--------------|----------------------|
|                                   |                       | normalized to 20° C   | maximum specific growth rate normalized to 20° | average fraction of metabolism devoted to growth |               |              |                      |
| <i>Aeromonas punctata</i>         |                       | $3.52 \times 10^{-6}$ |                                                |                                                  |               | [1]          |                      |
| <i>Aeromonas punctata</i>         |                       | $8.45 \times 10^{-6}$ |                                                |                                                  |               | [1]          |                      |
| <i>Arthrobacter globiformis</i>   |                       | $1.5 \times 10^{-6}$  |                                                |                                                  |               | [1]          |                      |
| <i>Azotobacter chroococcum</i>    | $1.2 \times 10^{-11}$ | $7.12 \times 10^{-6}$ | $1.61 \times 10^{-4}$                          | 0.958                                            | [2]           | [1]          | [2]                  |
| <i>Azotobacter chroococcum</i>    | $1.2 \times 10^{-11}$ | $6.56 \times 10^{-6}$ | $1.61 \times 10^{-4}$                          | 0.961                                            | [2]           | [1]          | [2]                  |
| <i>Azotobacter chroococcum</i>    | $1.2 \times 10^{-11}$ | $2.03 \times 10^{-6}$ | $1.61 \times 10^{-4}$                          | 0.988                                            | [2]           | [1]          | [2]                  |
| <i>Azotobacter vinilandii</i>     |                       | $4.87 \times 10^{-6}$ |                                                |                                                  |               | [1]          |                      |
| <i>Azotobacter vinilandii</i>     |                       | $8.74 \times 10^{-6}$ |                                                |                                                  |               | [1]          |                      |
| <i>Bacillus amyloliquefaciens</i> |                       | $1.62 \times 10^{-6}$ |                                                |                                                  |               | [3]          |                      |
| <i>Bacillus cereus</i>            | $3.7 \times 10^{-12}$ | $1.32 \times 10^{-6}$ | $2.9 \times 10^{-4}$                           | 0.995                                            | [2]           | [4]          | [2]                  |
| <i>Bacillus cereus</i>            | $3.7 \times 10^{-12}$ | $1.05 \times 10^{-6}$ | $2.9 \times 10^{-4}$                           | 0.996                                            | [2]           | [5]          | [2]                  |
| <i>Bacillus coagulans</i>         |                       | $2.53 \times 10^{-6}$ |                                                |                                                  |               | [1]          |                      |
| <i>Bacillus licheniformis</i>     | $8. \times 10^{-13}$  | $4.58 \times 10^{-6}$ | $4.73 \times 10^{-5}$                          | 0.912                                            | [2]           | [6]          | [2]                  |
| <i>Bacillus licheniformis</i>     | $8. \times 10^{-13}$  | $6.88 \times 10^{-6}$ | $4.73 \times 10^{-5}$                          | 0.873                                            | [2]           | [6]          | [2]                  |
| <i>Bacillus licheniformis</i>     | $8. \times 10^{-13}$  | $1.15 \times 10^{-6}$ | $4.73 \times 10^{-5}$                          | 0.976                                            | [2]           | [6]          | [2]                  |
| <i>Bacillus licheniformis</i>     | $8. \times 10^{-13}$  | $4.7 \times 10^{-6}$  | $4.73 \times 10^{-5}$                          | 0.91                                             | [2]           | [7]          | [2]                  |
| <i>Bacillus licheniformis</i>     | $8. \times 10^{-13}$  | $4.23 \times 10^{-6}$ | $4.73 \times 10^{-5}$                          | 0.918                                            | [2]           | [6]          | [2]                  |
| <i>Bacillus licheniformis</i>     | $8. \times 10^{-13}$  | $4.23 \times 10^{-6}$ | $4.73 \times 10^{-5}$                          | 0.918                                            | [2]           | [8]          | [2]                  |
| <i>Bacillus licheniformis</i>     | $8. \times 10^{-13}$  | $1.04 \times 10^{-6}$ | $4.73 \times 10^{-5}$                          | 0.979                                            | [2]           | [8]          | [2]                  |
| <i>Bacillus licheniformis</i>     | $8. \times 10^{-13}$  | $7.71 \times 10^{-6}$ | $4.73 \times 10^{-5}$                          | 0.86                                             | [2]           | [8]          | [2]                  |
| <i>Bacillus licheniformis</i>     | $8. \times 10^{-13}$  | $1.12 \times 10^{-7}$ | $4.73 \times 10^{-5}$                          | 0.998                                            | [2]           | [7]          | [2]                  |
| <i>Bacillus licheniformis</i>     | $8. \times 10^{-13}$  | $1.09 \times 10^{-6}$ | $4.73 \times 10^{-5}$                          | 0.977                                            | [2]           | [9]          | [2]                  |
| <i>Bacillus licheniformis</i>     | $8. \times 10^{-13}$  | $1.03 \times 10^{-6}$ | $4.73 \times 10^{-5}$                          | 0.979                                            | [2]           | [9]          | [2]                  |
| <i>Bacillus licheniformis</i>     | $8. \times 10^{-13}$  | $9.64 \times 10^{-7}$ | $4.73 \times 10^{-5}$                          | 0.98                                             | [2]           | [9]          | [2]                  |
| <i>Bacillus licheniformis</i>     | $8. \times 10^{-13}$  | $8.99 \times 10^{-7}$ | $4.73 \times 10^{-5}$                          | 0.981                                            | [2]           | [9]          | [2]                  |
| <i>Bacillus licheniformis</i>     | $8. \times 10^{-13}$  | $8.17 \times 10^{-7}$ | $4.73 \times 10^{-5}$                          | 0.983                                            | [2]           | [9]          | [2]                  |
| <i>Bacillus licheniformis</i>     | $8. \times 10^{-13}$  | $7.07 \times 10^{-7}$ | $4.73 \times 10^{-5}$                          | 0.985                                            | [2]           | [9]          | [2]                  |
| <i>Bacillus licheniformis</i>     | $8. \times 10^{-13}$  | $1.91 \times 10^{-6}$ | $4.73 \times 10^{-5}$                          | 0.961                                            | [2]           | [7]          | [2]                  |
| <i>Bacillus licheniformis</i>     | $8. \times 10^{-13}$  | $1.52 \times 10^{-6}$ | $4.73 \times 10^{-5}$                          | 0.969                                            | [2]           | [8]          | [2]                  |
| <i>Bacillus licheniformis</i>     | $8. \times 10^{-13}$  | $1.52 \times 10^{-6}$ | $4.73 \times 10^{-5}$                          | 0.969                                            | [2]           | [6]          | [2]                  |
| <i>Bacillus licheniformis</i>     | $8. \times 10^{-13}$  | $2.62 \times 10^{-6}$ | $4.73 \times 10^{-5}$                          | 0.947                                            | [2]           | [7]          | [2]                  |
| <i>Bacillus licheniformis</i>     | $8. \times 10^{-13}$  | $9.62 \times 10^{-7}$ | $4.73 \times 10^{-5}$                          | 0.98                                             | [2]           | [8]          | [2]                  |
| <i>Bacillus licheniformis</i>     | $8. \times 10^{-13}$  | $1.57 \times 10^{-6}$ | $4.73 \times 10^{-5}$                          | 0.968                                            | [2]           | [9]          | [2]                  |
| <i>Bacillus licheniformis</i>     | $8. \times 10^{-13}$  | $2.34 \times 10^{-6}$ | $4.73 \times 10^{-5}$                          | 0.953                                            | [2]           | [9]          | [2]                  |
| <i>Bacillus licheniformis</i>     | $8. \times 10^{-13}$  | $2.12 \times 10^{-6}$ | $4.73 \times 10^{-5}$                          | 0.957                                            | [2]           | [9]          | [2]                  |
| <i>Bacillus licheniformis</i>     | $8. \times 10^{-13}$  | $2.56 \times 10^{-6}$ | $4.73 \times 10^{-5}$                          | 0.949                                            | [2]           | [9]          | [2]                  |
| <i>Bacillus licheniformis</i>     | $8. \times 10^{-13}$  | $2.04 \times 10^{-6}$ | $4.73 \times 10^{-5}$                          | 0.959                                            | [2]           | [9]          | [2]                  |
| <i>Bacillus licheniformis</i>     | $8. \times 10^{-13}$  | $1.94 \times 10^{-6}$ | $4.73 \times 10^{-5}$                          | 0.961                                            | [2]           | [9]          | [2]                  |
| <i>Bacillus licheniformis</i>     | $8. \times 10^{-13}$  | $1.85 \times 10^{-6}$ | $4.73 \times 10^{-5}$                          | 0.962                                            | [2]           | [9]          | [2]                  |
| <i>Bacillus licheniformis</i>     | $8. \times 10^{-13}$  | $1.74 \times 10^{-6}$ | $4.73 \times 10^{-5}$                          | 0.965                                            | [2]           | [9]          | [2]                  |
| <i>Bacillus licheniformis</i>     | $8. \times 10^{-13}$  | $2.21 \times 10^{-6}$ | $4.73 \times 10^{-5}$                          | 0.955                                            | [2]           | [9]          | [2]                  |

| Species Name                      | Mass (g)                 | $b$ (s <sup>-1</sup> )  | $\mu_{max}$ (s <sup>-1</sup> )                 | $\bar{\gamma}$                                   | ref. for mass | ref. for $b$ | ref. for $\mu_{max}$ |
|-----------------------------------|--------------------------|-------------------------|------------------------------------------------|--------------------------------------------------|---------------|--------------|----------------------|
|                                   |                          | normalized to 20° C     | maximum specific growth rate normalized to 20° | average fraction of metabolism devoted to growth |               |              |                      |
| <i>Bacillus licheniformis</i>     | 8. × 10 <sup>-13</sup>   | 1.46 × 10 <sup>-6</sup> | 4.73 × 10 <sup>-5</sup>                        | 0.97                                             | [2]           | [9]          | [2]                  |
| <i>Bacillus licheniformis</i>     | 8. × 10 <sup>-13</sup>   | 2.28 × 10 <sup>-6</sup> | 4.73 × 10 <sup>-5</sup>                        | 0.954                                            | [2]           | [8]          | [2]                  |
| <i>Bacillus licheniformis</i>     | 8. × 10 <sup>-13</sup>   | 2.14 × 10 <sup>-6</sup> | 4.73 × 10 <sup>-5</sup>                        | 0.957                                            | [2]           | [9]          | [2]                  |
| <i>Bacillus licheniformis</i>     | 8. × 10 <sup>-13</sup>   | 2.05 × 10 <sup>-6</sup> | 4.73 × 10 <sup>-5</sup>                        | 0.958                                            | [2]           | [9]          | [2]                  |
| <i>Bacillus licheniformis</i>     | 8. × 10 <sup>-13</sup>   | 1.07 × 10 <sup>-6</sup> | 4.73 × 10 <sup>-5</sup>                        | 0.978                                            | [2]           | [9]          | [2]                  |
| <i>Bacillus licheniformis</i>     | 8. × 10 <sup>-13</sup>   | 1.96 × 10 <sup>-6</sup> | 4.73 × 10 <sup>-5</sup>                        | 0.96                                             | [2]           | [9]          | [2]                  |
| <i>Bacillus licheniformis</i>     | 8. × 10 <sup>-13</sup>   | 1.85 × 10 <sup>-6</sup> | 4.73 × 10 <sup>-5</sup>                        | 0.962                                            | [2]           | [9]          | [2]                  |
| <i>Bacillus licheniformis</i>     | 8. × 10 <sup>-13</sup>   | 1.65 × 10 <sup>-6</sup> | 4.73 × 10 <sup>-5</sup>                        | 0.966                                            | [2]           | [9]          | [2]                  |
| <i>Bacillus licheniformis</i>     | 8. × 10 <sup>-13</sup>   | 1.58 × 10 <sup>-6</sup> | 4.73 × 10 <sup>-5</sup>                        | 0.968                                            | [2]           | [9]          | [2]                  |
| <i>Bacillus licheniformis</i>     | 8. × 10 <sup>-13</sup>   | 1.67 × 10 <sup>-6</sup> | 4.73 × 10 <sup>-5</sup>                        | 0.966                                            | [2]           | [9]          | [2]                  |
| <i>Bacillus licheniformis</i>     | 8. × 10 <sup>-13</sup>   | 1.69 × 10 <sup>-6</sup> | 4.73 × 10 <sup>-5</sup>                        | 0.966                                            | [2]           | [9]          | [2]                  |
| <i>Bacillus licheniformis</i>     | 8. × 10 <sup>-13</sup>   | 1.21 × 10 <sup>-6</sup> | 4.73 × 10 <sup>-5</sup>                        | 0.975                                            | [2]           | [9]          | [2]                  |
| <i>Bacillus licheniformis</i>     | 8. × 10 <sup>-13</sup>   | 1.74 × 10 <sup>-6</sup> | 4.73 × 10 <sup>-5</sup>                        | 0.965                                            | [2]           | [9]          | [2]                  |
| <i>Bacillus licheniformis</i>     | 8. × 10 <sup>-13</sup>   | 1.74 × 10 <sup>-6</sup> | 4.73 × 10 <sup>-5</sup>                        | 0.965                                            | [2]           | [9]          | [2]                  |
| <i>Bacillus licheniformis</i>     | 8. × 10 <sup>-13</sup>   | 3.31 × 10 <sup>-6</sup> | 4.73 × 10 <sup>-5</sup>                        | 0.935                                            | [2]           | [3]          | [2]                  |
| <i>Bacillus megaterium</i>        | 2.28 × 10 <sup>-12</sup> | 7.31 × 10 <sup>-6</sup> | 9.74 × 10 <sup>-5</sup>                        | 0.93                                             | [10]          | [1]          | [11]                 |
| <i>Bacillus megaterium</i>        | 2.28 × 10 <sup>-12</sup> | 4.68 × 10 <sup>-6</sup> | 9.74 × 10 <sup>-5</sup>                        | 0.954                                            | [10]          | [1]          | [11]                 |
| <i>Bacillus pumilus</i>           |                          | 1.96 × 10 <sup>-6</sup> |                                                |                                                  |               | [3]          |                      |
| <i>Bacillus subtilis</i>          | 6.3 × 10 <sup>-13</sup>  | 8.61 × 10 <sup>-6</sup> | 1.19 × 10 <sup>-4</sup>                        | 0.933                                            | [12]          | [13]         | [14]                 |
| <i>Bacillus subtilis</i>          | 6.3 × 10 <sup>-13</sup>  | 1.14 × 10 <sup>-5</sup> | 1.19 × 10 <sup>-4</sup>                        | 0.912                                            | [12]          | [13]         | [14]                 |
| <i>Bacillus subtilis</i>          | 6.3 × 10 <sup>-13</sup>  | 2.33 × 10 <sup>-6</sup> | 1.19 × 10 <sup>-4</sup>                        | 0.981                                            | [12]          | [3]          | [14]                 |
| <i>Bacillus subtilis</i>          | 6.3 × 10 <sup>-13</sup>  | 2.6 × 10 <sup>-6</sup>  | 1.19 × 10 <sup>-4</sup>                        | 0.979                                            | [12]          | [13]         | [14]                 |
| <i>Bacillus subtilis</i>          | 6.3 × 10 <sup>-13</sup>  | 4.11 × 10 <sup>-6</sup> | 1.19 × 10 <sup>-4</sup>                        | 0.967                                            | [12]          | [13]         | [14]                 |
| <i>Bacillus subtilis</i>          | 6.3 × 10 <sup>-13</sup>  | 3.58 × 10 <sup>-6</sup> | 1.19 × 10 <sup>-4</sup>                        | 0.971                                            | [12]          | [3]          | [14]                 |
| <i>Bacillus subtilis</i>          | 6.3 × 10 <sup>-13</sup>  | 2.9 × 10 <sup>-6</sup>  | 1.19 × 10 <sup>-4</sup>                        | 0.976                                            | [12]          | [3]          | [14]                 |
| <i>Beneckea natriegens</i>        |                          | 3.81 × 10 <sup>-6</sup> |                                                |                                                  |               | [1]          |                      |
| <i>Beneckea natriegens</i>        |                          | 3.36 × 10 <sup>-5</sup> |                                                |                                                  |               | [1]          |                      |
| <i>Cellulomonas LC-10</i>         |                          | 3.24 × 10 <sup>-6</sup> |                                                |                                                  |               | [4]          |                      |
| <i>Corynebacterium glutamicum</i> | 6.19 × 10 <sup>-13</sup> | 2.4 × 10 <sup>-6</sup>  | 7.23 × 10 <sup>-5</sup>                        | 0.968                                            | [2]           | [15]         | [2]                  |
| <i>Corynebacterium glutamicum</i> | 6.19 × 10 <sup>-13</sup> | 1.03 × 10 <sup>-6</sup> | 7.23 × 10 <sup>-5</sup>                        | 0.986                                            | [2]           | [15]         | [2]                  |
| <i>Escherichia coli</i>           | 1.2 × 10 <sup>-12</sup>  | 2.01 × 10 <sup>-6</sup> | 4.17 × 10 <sup>-4</sup>                        | 0.995                                            | [2]           | [1]          | [2]                  |
| <i>Escherichia coli</i>           | 1.2 × 10 <sup>-12</sup>  | 3.5 × 10 <sup>-6</sup>  | 4.17 × 10 <sup>-4</sup>                        | 0.992                                            | [2]           | [1]          | [2]                  |
| <i>Escherichia coli</i>           | 1.2 × 10 <sup>-12</sup>  | 3.65 × 10 <sup>-6</sup> | 4.17 × 10 <sup>-4</sup>                        | 0.991                                            | [2]           | [1]          | [2]                  |
| <i>Escherichia coli</i>           | 1.2 × 10 <sup>-12</sup>  | 8.31 × 10 <sup>-7</sup> | 4.17 × 10 <sup>-4</sup>                        | 0.998                                            | [2]           | [1]          | [2]                  |
| <i>Escherichia coli</i>           | 1.2 × 10 <sup>-12</sup>  | 2.81 × 10 <sup>-5</sup> | 4.17 × 10 <sup>-4</sup>                        | 0.937                                            | [2]           | [1]          | [2]                  |
| <i>Escherichia coli</i>           | 1.2 × 10 <sup>-12</sup>  | 9.29 × 10 <sup>-6</sup> | 4.17 × 10 <sup>-4</sup>                        | 0.978                                            | [2]           | [1]          | [2]                  |
| <i>Escherichia coli</i>           | 1.2 × 10 <sup>-12</sup>  | 2.57 × 10 <sup>-6</sup> | 4.17 × 10 <sup>-4</sup>                        | 0.994                                            | [2]           | [1]          | [2]                  |
| <i>Escherichia coli</i>           | 1.2 × 10 <sup>-12</sup>  | 1.33 × 10 <sup>-6</sup> | 4.17 × 10 <sup>-4</sup>                        | 0.997                                            | [2]           | [1]          | [2]                  |
| <i>Escherichia coli</i>           | 1.2 × 10 <sup>-12</sup>  | 3.62 × 10 <sup>-6</sup> | 4.17 × 10 <sup>-4</sup>                        | 0.991                                            | [2]           | [1]          | [2]                  |
| <i>Escherichia coli</i>           | 1.2 × 10 <sup>-12</sup>  | 1.47 × 10 <sup>-5</sup> | 4.17 × 10 <sup>-4</sup>                        | 0.966                                            | [2]           | [1]          | [2]                  |
| <i>Escherichia coli</i>           | 1.2 × 10 <sup>-12</sup>  | 1.67 × 10 <sup>-5</sup> | 4.17 × 10 <sup>-4</sup>                        | 0.962                                            | [2]           | [1]          | [2]                  |
| <i>Escherichia coli</i>           | 1.2 × 10 <sup>-12</sup>  | 2.05 × 10 <sup>-5</sup> | 4.17 × 10 <sup>-4</sup>                        | 0.953                                            | [2]           | [1]          | [2]                  |
| <i>Klebsiella aerogenes</i>       |                          | 3.49 × 10 <sup>-6</sup> |                                                |                                                  |               | [1]          |                      |
| <i>Klebsiella aerogenes</i>       |                          | 3.13 × 10 <sup>-6</sup> |                                                |                                                  |               | [1]          |                      |
| <i>Klebsiella aerogenes</i>       |                          | 6.5 × 10 <sup>-6</sup>  |                                                |                                                  |               | [1]          |                      |
| <i>Klebsiella aerogenes</i>       |                          | 3.44 × 10 <sup>-6</sup> |                                                |                                                  |               | [1]          |                      |
| <i>Klebsiella aerogenes</i>       |                          | 3.44 × 10 <sup>-6</sup> |                                                |                                                  |               | [1]          |                      |
| <i>Klebsiella aerogenes</i>       |                          | 7.72 × 10 <sup>-6</sup> |                                                |                                                  |               | [1]          |                      |
| <i>Klebsiella aerogenes</i>       |                          | 4.28 × 10 <sup>-6</sup> |                                                |                                                  |               | [1]          |                      |
| <i>Lactobacillus casei</i>        | 1.9 × 10 <sup>-12</sup>  | 4.38 × 10 <sup>-7</sup> | 1.37 × 10 <sup>-4</sup>                        | 0.997                                            | [2]           | [16]         | [2]                  |
| <i>Lactococcus lactis</i>         | 2. × 10 <sup>-13</sup>   | 1.08 × 10 <sup>-5</sup> | 1.24 × 10 <sup>-4</sup>                        | 0.92                                             | [2]           | [17]         | [2]                  |
| <i>Lactococcus lactis</i>         | 2. × 10 <sup>-13</sup>   | 2.01 × 10 <sup>-6</sup> | 1.24 × 10 <sup>-4</sup>                        | 0.984                                            | [2]           | [17]         | [2]                  |
| <i>Lactococcus lactis</i>         | 2. × 10 <sup>-13</sup>   | 7.54 × 10 <sup>-5</sup> | 1.24 × 10 <sup>-4</sup>                        | 0.622                                            | [2]           | [17]         | [2]                  |
| <i>Lactococcus lactis</i>         | 2. × 10 <sup>-13</sup>   | 3.69 × 10 <sup>-5</sup> | 1.24 × 10 <sup>-4</sup>                        | 0.771                                            | [2]           | [18]         | [2]                  |
| <i>Lactococcus lactis</i>         | 2. × 10 <sup>-13</sup>   | 3.48 × 10 <sup>-5</sup> | 1.24 × 10 <sup>-4</sup>                        | 0.781                                            | [2]           | [18]         | [2]                  |
| <i>Lactococcus lactis</i>         | 2. × 10 <sup>-13</sup>   | 3.72 × 10 <sup>-5</sup> | 1.24 × 10 <sup>-4</sup>                        | 0.769                                            | [2]           | [18]         | [2]                  |
| <i>Lactococcus lactis</i>         | 2. × 10 <sup>-13</sup>   | 2.81 × 10 <sup>-5</sup> | 1.24 × 10 <sup>-4</sup>                        | 0.815                                            | [2]           | [18]         | [2]                  |
| <i>Lactococcus lactis</i>         | 2. × 10 <sup>-13</sup>   | 3.56 × 10 <sup>-5</sup> | 1.24 × 10 <sup>-4</sup>                        | 0.777                                            | [2]           | [18]         | [2]                  |
| <i>Lactococcus lactis</i>         | 2. × 10 <sup>-13</sup>   | 2.85 × 10 <sup>-6</sup> | 1.24 × 10 <sup>-4</sup>                        | 0.978                                            | [2]           | [19]         | [2]                  |
| <i>Methylococcus sp.</i>          |                          | 1.63 × 10 <sup>-6</sup> |                                                |                                                  |               | [1]          |                      |
| <i>Methylococcus sp.</i>          |                          | 8.89 × 10 <sup>-7</sup> |                                                |                                                  |               | [1]          |                      |

| Species Name                        | Mass (g)               | $b$ ( $s^{-1}$ )      | $\mu_{max}$ ( $s^{-1}$ )                       | $\bar{\gamma}$                                   | ref. for mass | ref. for $b$ | ref. for $\mu_{max}$ |
|-------------------------------------|------------------------|-----------------------|------------------------------------------------|--------------------------------------------------|---------------|--------------|----------------------|
|                                     |                        | normalized to 20° C   | maximum specific growth rate normalized to 20° | average fraction of metabolism devoted to growth |               |              |                      |
| <i>Methylmonas methanolica</i>      |                        | $1.2 \times 10^{-5}$  |                                                |                                                  |               | [1]          |                      |
| <i>Methylmonas methanolica</i>      |                        | $1.31 \times 10^{-5}$ |                                                |                                                  |               | [1]          |                      |
| <i>Micrococcus denitrificans</i>    |                        | $1.73 \times 10^{-6}$ |                                                |                                                  |               | [1]          |                      |
| <i>Micrococcus denitrificans</i>    |                        | $2.32 \times 10^{-6}$ |                                                |                                                  |               | [1]          |                      |
| <i>Micrococcus denitrificans</i>    |                        | $6.41 \times 10^{-7}$ |                                                |                                                  |               | [1]          |                      |
| <i>Micrococcus denitrificans</i>    |                        | $1.27 \times 10^{-7}$ |                                                |                                                  |               | [1]          |                      |
| <i>Micrococcus denitrificans</i>    |                        | $3.94 \times 10^{-6}$ |                                                |                                                  |               | [1]          |                      |
| <i>Micrococcus denitrificans</i>    |                        | $5.52 \times 10^{-6}$ |                                                |                                                  |               | [1]          |                      |
| <i>Micrococcus denitrificans</i>    |                        | $2.19 \times 10^{-6}$ |                                                |                                                  |               | [1]          |                      |
| <i>Micrococcus denitrificans</i>    |                        | $2.12 \times 10^{-6}$ |                                                |                                                  |               | [1]          |                      |
| <i>mixed bacterial culture</i>      |                        | $1.08 \times 10^{-6}$ |                                                |                                                  |               | [1]          |                      |
| <i>mixed bacterial culture</i>      |                        | $5.93 \times 10^{-7}$ |                                                |                                                  |               | [1]          |                      |
| <i>mixed bacterial culture</i>      |                        | $4.86 \times 10^{-6}$ |                                                |                                                  |               | [1]          |                      |
| <i>mixed bacterial culture</i>      |                        | $4.71 \times 10^{-6}$ |                                                |                                                  |               | [1]          |                      |
| <i>mixed culture bacterium</i>      |                        | $2.04 \times 10^{-6}$ |                                                |                                                  |               | [1]          |                      |
| <i>mixed culture bacterium</i>      |                        | $2.44 \times 10^{-6}$ |                                                |                                                  |               | [1]          |                      |
| <i>mixed culture bacterium</i>      |                        | $3.75 \times 10^{-6}$ |                                                |                                                  |               | [1]          |                      |
| <i>mixed culture bacterium</i>      |                        | $5.72 \times 10^{-6}$ |                                                |                                                  |               | [1]          |                      |
| <i>mixed culture bacterium</i>      |                        | $8.1 \times 10^{-6}$  |                                                |                                                  |               | [1]          |                      |
| <i>Neisseria meningitidis</i> B     | $3. \times 10^{-13}$   | $1.33 \times 10^{-6}$ | $5.13 \times 10^{-5}$                          | 0.975                                            | [2]           | [20]         | [2]                  |
| <i>Pseudomonas 1</i>                |                        | $1.94 \times 10^{-6}$ |                                                |                                                  |               | [1]          |                      |
| <i>Pseudomonas aeruginosa</i>       | $6. \times 10^{-13}$   | $1.25 \times 10^{-6}$ | $1.03 \times 10^{-4}$                          | 0.988                                            | [2]           | [21]         | [2]                  |
| <i>Pseudomonas C</i>                |                        | $4.27 \times 10^{-6}$ |                                                |                                                  |               | [1]          |                      |
| <i>Pseudomonas I</i>                |                        | $1.58 \times 10^{-6}$ |                                                |                                                  |               | [1]          |                      |
| <i>Pseudomonas I35</i>              |                        | $2.83 \times 10^{-6}$ |                                                |                                                  |               | [1]          |                      |
| <i>Pseudomonas I35</i>              |                        | $2.85 \times 10^{-6}$ |                                                |                                                  |               | [1]          |                      |
| <i>Pseudomonas methyltrophia</i>    |                        | $6.46 \times 10^{-6}$ |                                                |                                                  |               | [1]          |                      |
| <i>Pseudomonas oxalaticus</i>       |                        | $7.58 \times 10^{-7}$ |                                                |                                                  |               | [1]          |                      |
| <i>Pseudomonas oxalaticus</i>       |                        | $2.04 \times 10^{-6}$ |                                                |                                                  |               | [1]          |                      |
| <i>Rhizobium leguminosarum</i>      | $6. \times 10^{-13}$   | $3.71 \times 10^{-7}$ | $2.4 \times 10^{-5}$                           | 0.985                                            | [2]           | [22]         | [2]                  |
| <i>Rhizobium leguminosarum</i>      | $6. \times 10^{-13}$   | $6.81 \times 10^{-7}$ | $2.4 \times 10^{-5}$                           | 0.972                                            | [2]           | [22]         | [2]                  |
| <i>Rhodopseudomonas sheperoides</i> |                        | $8.37 \times 10^{-7}$ |                                                |                                                  |               | [1]          |                      |
| <i>Rhodopseudomonas sheperoides</i> |                        | $3.46 \times 10^{-6}$ |                                                |                                                  |               | [1]          |                      |
| <i>Streptococcus faecalis</i>       | $1. \times 10^{-12}$   | $3.78 \times 10^{-6}$ | $1.37 \times 10^{-4}$                          | 0.973                                            | [2]           | [23]         | [2]                  |
| <i>Streptococcus faecalis</i>       | $1. \times 10^{-12}$   | $3.21 \times 10^{-6}$ | $1.37 \times 10^{-4}$                          | 0.977                                            | [2]           | [23]         | [2]                  |
| <i>Streptococcus faecalis</i>       | $1. \times 10^{-12}$   | $4.1 \times 10^{-5}$  | $1.37 \times 10^{-4}$                          | 0.769                                            | [2]           | [23]         | [2]                  |
| <i>Candida Albicans</i>             | $1.71 \times 10^{-11}$ | $2.48 \times 10^{-7}$ | $1.49 \times 10^{-5}$                          | 0.984                                            | [24]          | [25]         | [26]                 |
| <i>Candida Albicans</i>             | $1.71 \times 10^{-11}$ | $7.66 \times 10^{-7}$ | $1.49 \times 10^{-5}$                          | 0.951                                            | [24]          | [25]         | [26]                 |
| <i>Candida boidinii</i>             | $4.22 \times 10^{-10}$ | $1.63 \times 10^{-6}$ | $1.65 \times 10^{-5}$                          | 0.91                                             | [27]          | [1]          | [28]                 |
| <i>Candida lipolytica</i>           | $4.22 \times 10^{-10}$ | $8.73 \times 10^{-7}$ | $4.15 \times 10^{-5}$                          | 0.979                                            | [29]          | [1]          | [30]                 |
| <i>Candida lipolytica</i>           | $4.22 \times 10^{-10}$ | $6.8 \times 10^{-6}$  | $4.15 \times 10^{-5}$                          | 0.859                                            | [29]          | [1]          | [30]                 |
| <i>Candida lipolytica</i>           | $4.22 \times 10^{-10}$ | $6.6 \times 10^{-6}$  | $4.15 \times 10^{-5}$                          | 0.863                                            | [29]          | [1]          | [30]                 |
| <i>Candida lipolytica</i>           | $4.22 \times 10^{-10}$ | $3.96 \times 10^{-6}$ | $4.15 \times 10^{-5}$                          | 0.913                                            | [29]          | [1]          | [30]                 |
| <i>Candida lipolytica</i>           | $4.22 \times 10^{-10}$ | $1.08 \times 10^{-6}$ | $4.15 \times 10^{-5}$                          | 0.975                                            | [29]          | [1]          | [30]                 |
| <i>Candida lipolytica</i>           | $4.22 \times 10^{-10}$ | $7.99 \times 10^{-6}$ | $4.15 \times 10^{-5}$                          | 0.838                                            | [29]          | [1]          | [30]                 |
| <i>Candida lipolytica</i>           | $4.22 \times 10^{-10}$ | $1.23 \times 10^{-5}$ | $4.15 \times 10^{-5}$                          | 0.772                                            | [29]          | [1]          | [30]                 |
| <i>Candida lipolytica</i>           | $4.22 \times 10^{-10}$ | $1.21 \times 10^{-5}$ | $4.15 \times 10^{-5}$                          | 0.775                                            | [29]          | [1]          | [30]                 |
| <i>Candida lipolytica</i>           | $4.22 \times 10^{-10}$ | $7.2 \times 10^{-6}$  | $4.15 \times 10^{-5}$                          | 0.852                                            | [29]          | [1]          | [30]                 |
| <i>Candida lipolytica</i>           | $4.22 \times 10^{-10}$ | $1.11 \times 10^{-5}$ | $4.15 \times 10^{-5}$                          | 0.789                                            | [29]          | [1]          | [30]                 |
| <i>Candida utilis</i>               | $1. \times 10^{-11}$   | $2.09 \times 10^{-6}$ | $4.46 \times 10^{-5}$                          | 0.955                                            | [31, 32]      | [1]          | [32]                 |
| <i>Candida utilis</i>               | $1. \times 10^{-11}$   | $1.88 \times 10^{-6}$ | $4.46 \times 10^{-5}$                          | 0.96                                             | [31, 32]      | [1]          | [32]                 |
| <i>Candida utilis</i>               | $1. \times 10^{-11}$   | $1.58 \times 10^{-6}$ | $4.46 \times 10^{-5}$                          | 0.966                                            | [31, 32]      | [1]          | [32]                 |
| <i>Candida utilis</i>               | $1. \times 10^{-11}$   | $3.52 \times 10^{-6}$ | $4.46 \times 10^{-5}$                          | 0.927                                            | [31, 32]      | [1]          | [32]                 |
| <i>Candida utilis</i>               | $1. \times 10^{-11}$   | $2.5 \times 10^{-6}$  | $4.46 \times 10^{-5}$                          | 0.947                                            | [31, 32]      | [1]          | [32]                 |
| <i>Candida utilis</i>               | $1. \times 10^{-11}$   | $5.44 \times 10^{-6}$ | $4.46 \times 10^{-5}$                          | 0.891                                            | [31, 32]      | [1]          | [32]                 |
| <i>Chlamydomonas reinhardtii</i>    | $3.69 \times 10^{-11}$ | $5.29 \times 10^{-7}$ | $1.74 \times 10^{-5}$                          | 0.97                                             | [33]          | [34]         | [35]                 |
| <i>Chlamydomonas reinhardtii</i>    | $3.69 \times 10^{-11}$ | $1.41 \times 10^{-6}$ | $1.74 \times 10^{-5}$                          | 0.925                                            | [33]          | [36]         | [35]                 |
| <i>Chlorella ellipsoidea</i>        | $3.4 \times 10^{-11}$  | $7.15 \times 10^{-7}$ | $1.93 \times 10^{-5}$                          | 0.964                                            | [37]          | [38]         | [37]                 |
| <i>Chlorella pyrenoidosa</i>        | $1.25 \times 10^{-11}$ | $2.19 \times 10^{-6}$ | $1.66 \times 10^{-5}$                          | 0.884                                            | [39]          | [38]         | [40]                 |
| <i>Chlorella regularis</i>          | $5.22 \times 10^{-12}$ | $8.12 \times 10^{-7}$ | $1.96 \times 10^{-5}$                          | 0.96                                             | [41, 42]      | [1]          | [42]                 |
| <i>Chlorella regularis</i>          |                        | $8.12 \times 10^{-7}$ |                                                |                                                  |               | [1]          |                      |

| Species Name                     | Mass (g)               | $b$ ( $s^{-1}$ )       | $\mu_{max}$ ( $s^{-1}$ )                       | $\bar{\gamma}$                                   | ref. for mass | ref. for $b$ | ref. for $\mu_{max}$ |
|----------------------------------|------------------------|------------------------|------------------------------------------------|--------------------------------------------------|---------------|--------------|----------------------|
|                                  |                        | normalized to 20° C    | maximum specific growth rate normalized to 20° | average fraction of metabolism devoted to growth |               |              |                      |
| <i>Chlorella regularis</i>       | $5.22 \times 10^{-12}$ | $1.56 \times 10^{-6}$  | $1.96 \times 10^{-5}$                          | 0.926                                            | [41, 42]      | [1]          | [42]                 |
| <i>Chlorella regularis</i>       |                        | $1.56 \times 10^{-6}$  |                                                |                                                  |               | [1]          |                      |
| <i>Chlorella sorokiniana</i>     | $2.65 \times 10^{-12}$ | $1.52 \times 10^{-6}$  | $1.87 \times 10^{-5}$                          | 0.925                                            | [43]          | [38]         | [43]                 |
| <i>Chlorella vulgaris</i>        | $4.68 \times 10^{-12}$ | $4.2 \times 10^{-6}$   | $1.55 \times 10^{-5}$                          | 0.787                                            | [44]          | [45]         | [44]                 |
| <i>Dunaliella tertiolecta</i>    | $2.13 \times 10^{-11}$ | $6.3 \times 10^{-6}$   |                                                |                                                  | [46]          | [46]         |                      |
| <i>Hansenula polymorpha</i>      | $2.65 \times 10^{-12}$ | $1.27 \times 10^{-6}$  | $1.66 \times 10^{-5}$                          | 0.929                                            | [47]          | [1]          | [48]                 |
| <i>Hansenula polymorpha</i>      | $2.65 \times 10^{-12}$ | $1.2 \times 10^{-6}$   | $1.66 \times 10^{-5}$                          | 0.932                                            | [47]          | [1]          | [48]                 |
| <i>Hansenula polymorpha</i>      | $2.65 \times 10^{-12}$ | $1.81 \times 10^{-6}$  | $1.66 \times 10^{-5}$                          | 0.902                                            | [47]          | [1]          | [48]                 |
| <i>Hansenula polymorpha</i>      | $2.65 \times 10^{-12}$ | $2.57 \times 10^{-6}$  | $1.66 \times 10^{-5}$                          | 0.866                                            | [47]          | [1]          | [48]                 |
| <i>id</i>                        |                        | $1.28 \times 10^{-6}$  | $8.55 \times 10^{-6}$                          | 0.87                                             |               | [38]         | [38]                 |
| <i>Isochrysis galbana</i>        | $1.26 \times 10^{-11}$ | $7.45 \times 10^{-7}$  |                                                |                                                  | [49]          | [49]         |                      |
| <i>Ochromonas sp.</i>            | $1.56 \times 10^{-10}$ | $5.09 \times 10^{-6}$  | $5. \times 10^{-5}$                            | 0.908                                            | [2]           | [50]         | [2]                  |
| <i>Paecilomyces varioti</i>      |                        | $9.75 \times 10^{-6}$  |                                                |                                                  |               | [1]          |                      |
| <i>Pen. chrysogenum</i>          |                        | $1.74 \times 10^{-6}$  |                                                |                                                  |               | [1]          |                      |
| <i>Pen. chrysogenum</i>          |                        | $2.09 \times 10^{-6}$  |                                                |                                                  |               | [1]          |                      |
| <i>Pen. chrysogenum</i>          |                        | $6.42 \times 10^{-6}$  |                                                |                                                  |               | [1]          |                      |
| <i>Pen. chrysogenum</i>          |                        | $6.71 \times 10^{-6}$  |                                                |                                                  |               | [1]          |                      |
| <i>Prorocentrum micans</i>       | $6.57 \times 10^{-10}$ | $5.31 \times 10^{-7}$  |                                                |                                                  | [49]          | [49]         |                      |
| <i>Saccharomyces cerevisiae</i>  | $8.25 \times 10^{-12}$ | $1.02 \times 10^{-6}$  | $4.1 \times 10^{-5}$                           | 0.976                                            | [51]          | [1]          | [52]                 |
| <i>Saccharomyces cerevisiae</i>  | $8.25 \times 10^{-12}$ | $2.17 \times 10^{-6}$  | $4.1 \times 10^{-5}$                           | 0.95                                             | [51]          | [1]          | [52]                 |
| <i>Saccharomyces cerevisiae</i>  | $8.25 \times 10^{-12}$ | $6.08 \times 10^{-6}$  | $4.1 \times 10^{-5}$                           | 0.871                                            | [51]          | [53]         | [52]                 |
| <i>Scenedesmus obliquus</i>      | $3.57 \times 10^{-11}$ | $1.64 \times 10^{-6}$  | $9.86 \times 10^{-6}$                          | 0.858                                            | [54]          | [38]         | [55]                 |
| <i>Skeletonema costatum</i>      | $1.98 \times 10^{-11}$ | $-1.26 \times 10^{-6}$ |                                                |                                                  | [46]          | [46]         |                      |
| <i>Thalassiosira weissflogii</i> | $2.25 \times 10^{-10}$ | $4.67 \times 10^{-7}$  | $1.01 \times 10^{-5}$                          | 0.956                                            | [49]          | [49]         | [56]                 |
| <i>Trichoderma viride</i>        | $2.16 \times 10^{-10}$ | $8.93 \times 10^{-7}$  | $1.43 \times 10^{-5}$                          | 0.941                                            | [57]          | [1]          | [58]                 |
| <i>Trichoderma viride</i>        | $2.16 \times 10^{-10}$ | $4.47 \times 10^{-6}$  | $1.43 \times 10^{-5}$                          | 0.762                                            | [57]          | [1]          | [58]                 |
| <i>Trichoderma viride</i>        | $2.16 \times 10^{-10}$ | $1.2 \times 10^{-6}$   | $1.43 \times 10^{-5}$                          | 0.923                                            | [57]          | [1]          | [58]                 |
| <i>Trichoderma viride</i>        | $2.16 \times 10^{-10}$ | $5.96 \times 10^{-6}$  | $1.43 \times 10^{-5}$                          | 0.706                                            | [57]          | [1]          | [58]                 |
| <i>Brachionus calyciflorus</i>   | $1.25 \times 10^{-7}$  | $2.87 \times 10^{-6}$  | $1.01 \times 10^{-5}$                          | 0.778                                            | [59]          | [59]         | [59]                 |

## References

- [1] Heijnen J, Roels J (1981) A macroscopic model describing yield and maintenance relationships in aerobic fermentation processes. *Biotechnology and Bioengineering* 23:739–763.
- [2] DeLong J, Okie J, Moses M, Sibly R, Brown J (2010) Shifts in metabolic scaling, production, and efficiency across major evolutionary transitions of life. *Proc Natl Acad Sci USA* 107:12941–12945.
- [3] Tännler S, Decasper S, Sauer U (2008) Maintenance metabolism and carbon fluxes in bacillus species. *Microbial cell factories* 7:19.
- [4] Summers R, Boudreaux D, Srinivasan V (1979) Continuous cultivation for apparent optimization of defined media for cellulomonas sp. and bacillus cereus. *Applied and environmental microbiology* 38:66–71.
- [5] Boudreaux D, Srinivasan V (1981) A continuous culture study of growth of bacillus cereus t. *Journal of General Microbiology* 122:129–136.
- [6] Frankena J, Koningstein G, van Verseveld H, Stouthamer A (1986) Effect of different limitations in chemostat cultures on growth and production of exocellular protease by bacillus licheniformis. *Applied microbiology and biotechnology* 24:106–112.
- [7] Bulthuis B, Koningstein G, Stouthamer A, van Verseveld H (1989) A comparison between aerobic growth of bacillus licheniformis in continuous culture and partial-recycling fermentor, with contributions to the discussion on maintenance energy demand. *Arch Microbiol* 152:499–507.
- [8] Frankena J, Verseveld H, Stouthamer A (1985) A continuous culture study of the bioenergetic aspects of growth and production of exocellular protease in bacillus licheniformis. *Applied microbiology and biotechnology* 22:169–176.
- [9] Frankena J, Verseveld HV, Stouthamer A (1988) Substrate and energy costs of the production of exocellular enzymes by bacillus licheniformis. *Biotechnology and bioengineering* 32:803–812.
- [10] Sud I, Schaechter M (1964) Dependence of the content of cell envelopes on the growth rate of bacillus megaterium. *Journal of bacteriology* 88:1612–1617.

- [11] Ratkowsky D, Lowry R, McMeekin T, Stokes A, Chandler R (1983) Model for bacterial culture growth rate throughout the entire biokinetic temperature range. *Journal of Bacteriology* 154:1222–1226.
- [12] Godin M, et al. (2010) Using buoyant mass to measure the growth of single cells. *Nature Methods* 7:387–390.
- [13] Sauer U, Hatzimanikatis V, Hohmann H (1996) Physiology and metabolic fluxes of wild-type and riboflavin-producing bacillus subtilis. *Applied and Environmental Microbiology* 62:3687–3696.
- [14] Warth A (1978) Relationship between the heat resistance of spores and the optimum and maximum growth temperatures of bacillus species. *Journal of bacteriology* 134:699–705.
- [15] Cocaign-Bousquet M, Guyonvarch A, Lindley N (1996) Growth rate-dependent modulation of carbon flux through central metabolism and the kinetic consequences for glucose-limited chemostat cultures of corynebacterium glutamicum. *Applied and environmental microbiology* 62:429–436.
- [16] Vries WD, Kapteijn W, Beek EVD, Stouthamer A (1970) Molar growth yields and fermentation balances of lactobacillus casei l3 in batch cultures and in continuous cultures. *Microbiology* 63:333–345.
- [17] Lan CQ, Oddone G, Mills DA, Block DE (2006) Kinetics of lactococcus lactis growth and metabolite formation under aerobic and anaerobic conditions in the presence or absence of hemin. *Biotechnology and bioengineering* 95:1070–1080.
- [18] Razvi A, Zhang Z, Lan C (2008) Effects of glucose and nitrogen source concentration on batch fermentation kinetics of lactococcus lactis under hemin-stimulated respirative condition. *Biotechnology progress* 24:852–858.
- [19] Meghrous J, Huot E, Quittelier M, Petitdemange H (1992) Regulation of nisin biosynthesis by continuous cultures and by resting cell of lactococcus lactis subsp. lactis. *Research in microbiology* 143:879–890.

- [20] Baart GJ, et al. (2008) Modeling neisseria meningitidis b metabolism at different specific growth rates. *Biotechnology and bioengineering* 101:1022–1035.
- [21] Chen F, Xia Q, Ju LK (2006) Competition between oxygen and nitrate respirations in continuous culture of pseudomonas aeruginosa performing aerobic denitrification. *Biotechnology and bioengineering* 93:1069–1078.
- [22] Ratcliffe H, Drozd J, Bull A (1983) Growth energetics of rhizobium leguminosarum in chemostat culture. *Journal of General Microbiology* 129:1697–1706.
- [23] Ohara H, Hiyama K, Yoshida T (1992) Kinetics of growth and lactic acid production in continuous and batch culture. *Appl Microbiol Biotechnol* 37:544–548.
- [24] Herman M, Soll D (1984) A comparison of volume growth during bud and mycelium formation in candida albicans: a single analysis. *Journal of General Microbiology* 130:2219–2228.
- [25] Shepherd M, Sullivan P (1976) The production and growth characteristics of yeast and mycelial forms of candida albicans in continuous culture. *Journal of General Microbiology* 93:361–370.
- [26] Basson N (2000) Competition for glucose between candida albicans and oral bacteria grown in mixed culture in a chemostat. *Journal of medical microbiology* 49:969–975.
- [27] Walther T, Reinsch H (2004) Mathematical modeling of regulatory mechanisms in yeast colony development. *Journal of theoretical biology* 229:327–338.
- [28] Pilat P, Prokop A (1975) The effect of methanol, formaldehyde, and formic acid on growth of candida boidinii 11 bh. *Biotechnology and bioengineering* 17:1717–1728.
- [29] Lopes M, et al. (2008) Yarrowia lipolytica lipase production enhanced by increased air pressure. *Letters in Applied Microbiology* 46:255–260.

- [30] Sarubbo L, et al. (2001) Bioemulsifier production in batch culture using glucose as carbon source by *Candida lipolytica*. *Applied biochemistry and biotechnology* 95:59–67.
- [31] Brown C, Rose A (1969) Effects of temperature on composition and cell volume of *Candida utilis*. *Journal of bacteriology* 97:261–272.
- [32] Button D, Garver J (1966) Continuous culture of *Torulopsis utilis*: a kinetic study of oxygen limited growth. *Journal of General Microbiology* 45:195–204.
- [33] Bradley BA (2005) A nima-related kinase, *cnk2p*, regulates both flagellar length and cell size in *Chlamydomonas*. *Journal of Cell Science* 118:3317–3326.
- [34] Chen F, Johns M (1996) Heterotrophic growth of *Chlamydomonas reinhardtii* on acetate in chemostat culture. *Process Biochemistry* 31:601–604.
- [35] Weger H (1999) Ferric and cupric reductase activities in the green alga *Chlamydomonas reinhardtii*: experiments using iron-limited chemostats. *Planta* 207:377–384.
- [36] Kliphuis AMJ, et al. (2011) Metabolic modeling of *Chlamydomonas reinhardtii*: energy requirements for photoautotrophic growth and maintenance. *Journal of applied phycology* pp 1–14.
- [37] Fenchel T (1974) Intrinsic rate of natural increase: the relationship with body size. *Oecologia* 14:317–326.
- [38] Gons H, Mur L (1980) Energy requirements for growth and maintenance of *Scenedesmus protuberans* Fritsch in light-limited continuous cultures. *Archives of microbiology* 125:9–17.
- [39] Grant B, Turner I (1969) Light-stimulated nitrate and nitrite assimilation in several species of algae. *Comparative Biochemistry and Physiology* 29:995–1004.
- [40] Goldman J, Carpenter E (1974) A kinetic approach to the effect of temperature on algal growth. *Limnology and Oceanography* 19:756–766.



- [41] Ishikawa E, Abe H (2004) Lycopene accumulation and cyclic carotenoid deficiency in heterotrophic chlorella treated with nicotine. *Journal of Industrial Microbiology and Biotechnology* 31:585–589.
- [42] Sansawa H, Endo H (2004) Production of intracellular phytochemicals in chlorella under heterotrophic conditions. *Journal of bioscience and bioengineering* 98:437–444.
- [43] Morita M, Watanabe Y, Saiki H (2000) High photosynthetic productivity of green microalga chlorella sorokiniana. *Applied biochemistry and biotechnology* 87:203–218.
- [44] Yoshida T, Hairston NG, Ellner SP (2004) Evolutionary trade-off between defence against grazing and competitive ability in a simple unicellular alga, chlorella vulgaris. *Proceedings of the Royal Society B: Biological Sciences* 271:1947–1953.
- [45] Lee Y, Pirt S (1981) Energetics of photosynthetic algal growth: influence of intermittent illumination in short (40 s) cycles. *Microbiology* 124:43–52.
- [46] Falkowski P, Owens T (1980) Light–shade adaptation: two strategies in marine phytoplankton. *Plant physiology* 66:592–595.
- [47] Veenhuis M, Keizer I, Harder W (1979) Characterization of peroxisomes in glucose-grown hansenula polymorpha and their development after the transfer of cells into methanol-containing media. *Archives of Microbiology* 120:167–175.
- [48] Levine D, Cooney C (1973) Isolation and characterization of a thermotolerant methanol-utilizing yeast. *Applied and Environmental Microbiology* 26:982–990.
- [49] Falkowski P, Dubinsky Z, Wyman K (1985) Growth-irradiance relationships in phytoplankton. *Limnology and Oceanography* 30:311–321.
- [50] Fenchel T (1982) Ecology of heterotrophic microflagellates. 2. bioenergetics and growth. *Mar. Ecol. Prog. Ser* 8:225–231.
- [51] Johnston G, Ehrhardt C, Lorincz A, Carter B (1979) Regulation of cell size in the yeast saccharomyces cerevisiae. *Journal of bacteriology* 137:1–5.

- [52] Blank LM, Sauer U (2004) Tca cycle activity in *saccharomyces cerevisiae* is a function of the environmentally determined specific growth and glucose uptake rates. *Microbiology* 150:1085–1093.
- [53] Rieger M, Käppeli O, Fiechter A (1983) The role of limited respiration in the incomplete oxidation of glucose by *saccharomyces cerevisiae*. *Microbiology* 129:653–661.
- [54] Shuter B (1978) Size dependence of phosphorus and nitrogen subsistence quotas in unicellular microorganisms. *Limnology and Oceanography* 23:1248–1255.
- [55] Martínez M, Jiménez J, Yousfi FE (1999) Influence of phosphorus concentration and temperature on growth and phosphorus uptake by the microalga *scenedesmus obliquus*. *Bioresource technology* 67:233–240.
- [56] Sunda W, Huntsman S (1997) Interrelated influence of iron, light and cell size on marine phytoplankton growth. *Nature* 390:389–392.
- [57] Rosen D, Edelman M, Galun E, Danon D (1974) Biogenesis of mitochondria in *trichoderma viride*: Structural changes in mitochondria and other spore constituents during conidium maturation and germination. *Journal of General Microbiology* 83:31–49.
- [58] Brown D, Halsted D (1975) The effect of acid ph on the growth kinetics of *trichoderma viride*. *Biotechnology and bioengineering* 17:1199–1210.
- [59] Boraas M (1983) Population dynamics of food-limited rotifers in two-stage chemostat culture. *Limnology and Oceanography* 28:546–563.
